# Supplementary material for: Biogeochemical Factors of Cs, Sr, U, Pu Immobilization in Bottom Sediments of the Upa River, Located in the Zone of Chernobyl Accident
Source: MDPI journal article supplement (doi:10.3390/biology12010010), 2022-12-21
Supplement: s1 [file s1]

## Supplimentary files

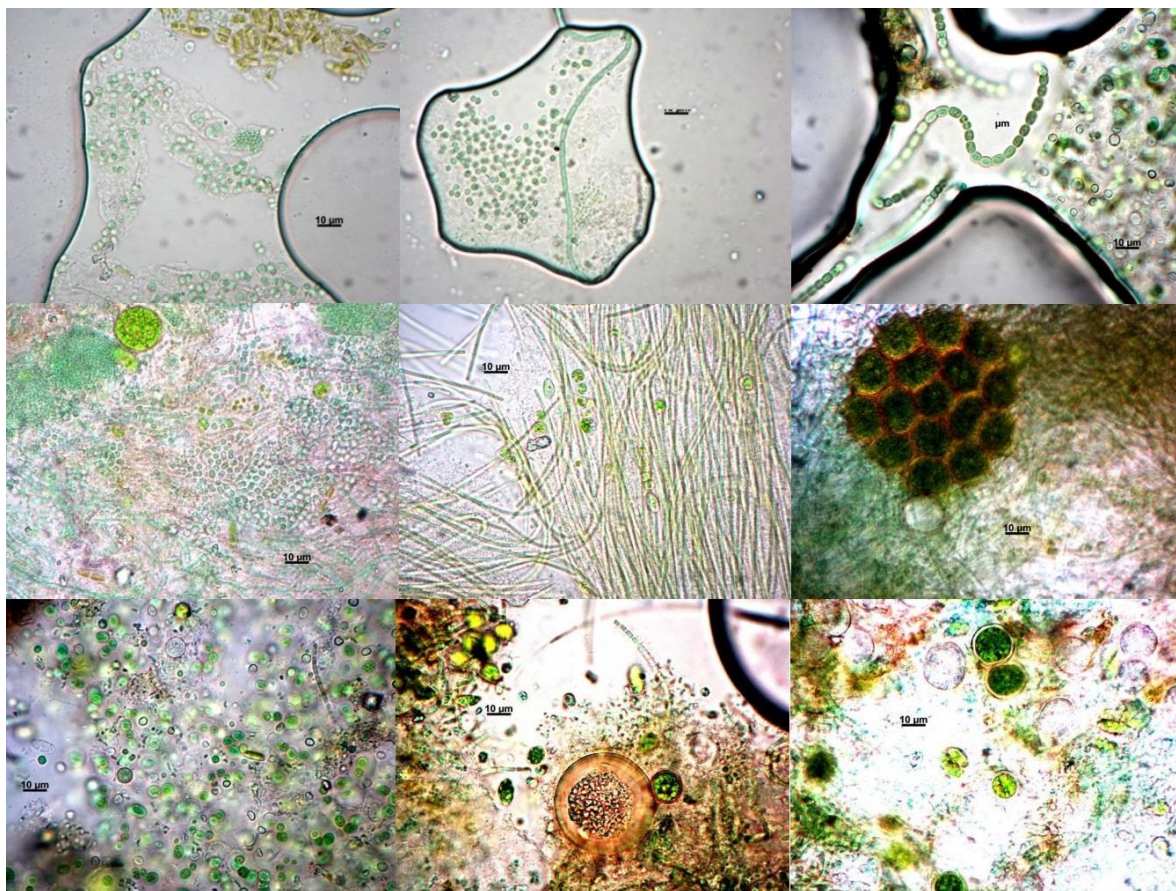

**Figure S1.** Phytoplankton diversity in a water sample from the Upa River.

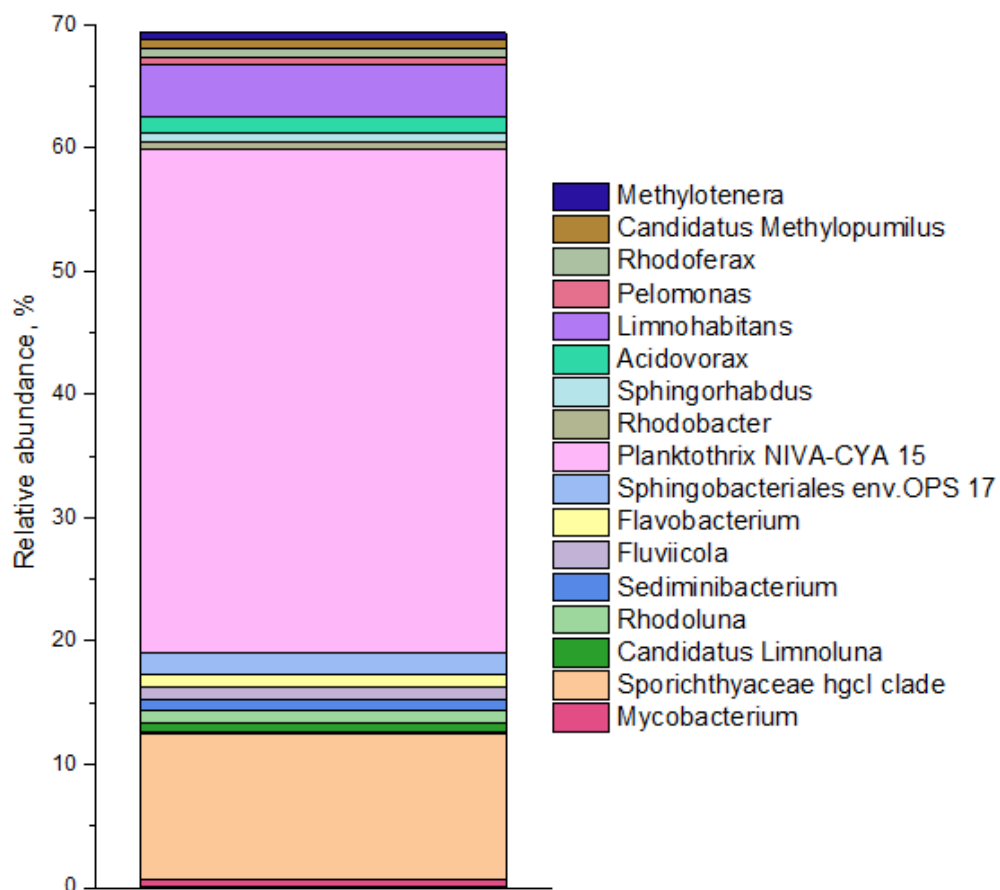

**Figure S2.** Prokaryotic community diversity profile of the phytoplankton community by 16S rNA genes.

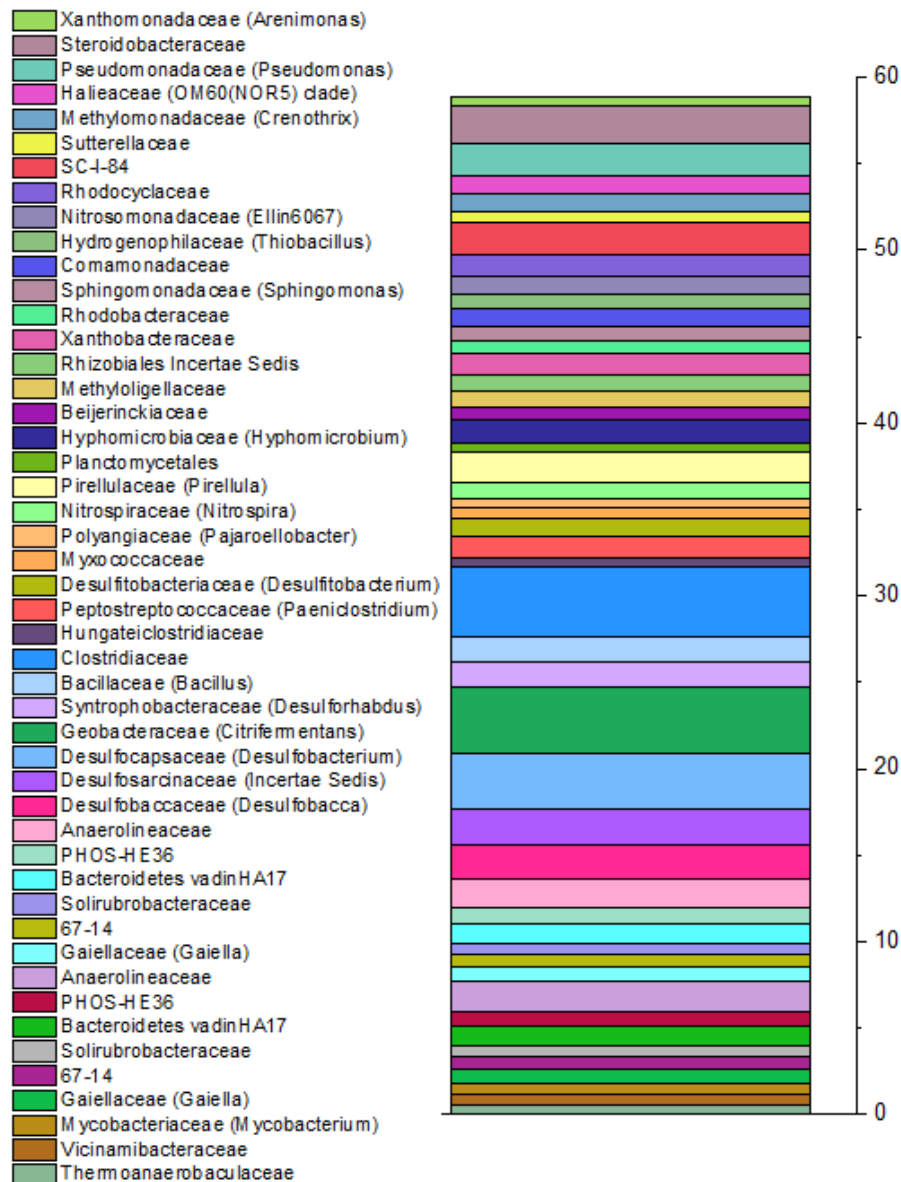

**Figure S3.** Profiling the microbial community of an anaerobic sludge sample by 16S rRNA genes.
